# Supplementary material for: A computational approach for designing D-proteins with non-canonical amino acid optimised binding affinity
Source: PubMed Central journal article supplement (PMC5673230; doi:10.1371/journal.pone.0187524), 2017-11-06
Supplement: pone.0187524.s001.pdf [file pone.0187524.s001.pdf]

| NCAA name                 | Code | Structure                                                                           |
|---------------------------|------|-------------------------------------------------------------------------------------|
| 2,3-diaminopropanoic acid | DPP  | 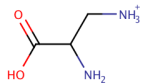   |
| 2-indanyl-glycine         | IGL  |    |
| Phenylglycine             | 004  |    |
| 4-hydroxyphenylglycine    | D4P  |    |
| 2-napthylalanine          | NAL  |    |
| 2-amino-6-oxopimelic acid | 26P  |   |
| Homoserine                | HSE  |  |
| Diaminobutyric acid       | DAB  |  |
| Cyclohexylalanine         | ALC  |  |
| 2-aminobutyric acid       | ABA  |  |
